# Supplementary material for: A facile ratiometric near-infrared fluorescent probe using conjugated 1,8-naphthalimide and dicyanoisophorone with a vinylene linker for detection and bioimaging of hypochlorite
Source: Royal Society of Chemistry journal article supplement (doi:10.1039/d3ay00820g), 2023-01-01
Supplement: d3ay00820g1.pdf [file d3ay00820g1.pdf]

## Supporting Information for

# **A facile ratiometric near-infrared fluorescent probe using conjugated 1,8-naphthalimide and dicyanoisophorone with a vinylene linker for detection and bioimaging of hypochlorite**

Ziyi Zhang<sup>a</sup>, Lili Ma<sup>a</sup>, Yanlan Huang<sup>a</sup>, Yan Zhou<sup>a</sup>, Hua Zhang<sup>a</sup>, Jinwu Yan<sup>b, \*</sup> and Chuanxiang Liu<sup>\*,a</sup>

<sup>a</sup> School of Chemical and Environmental Engineering, Shanghai Institute of Technology, Shanghai 201418, P. R.

China

<sup>b</sup> MOE International Joint Research Laboratory on Synthetic Biology and Medicines, School of Biology and  
Biological Engineering, South China University of Technology, Guangzhou 510006, P.R. China

Email: cxliu@sit.edu.cn; yjw@scut.edu.cn

## **Contents of Supporting Information**

|                                                                                                                             |   |
|-----------------------------------------------------------------------------------------------------------------------------|---|
| 1. The preparation of PBS solution <sup>[1]</sup> .....                                                                     | 2 |
| 2. <sup>1</sup> H-NMR spectrum of <b>1</b> .....                                                                            | 2 |
| 3. <sup>1</sup> H NMR, <sup>13</sup> C NMR and LC-MS spectrum of probe <b>3</b> .....                                       | 2 |
| 4. Solvent effect of probe <b>3</b> .....                                                                                   | 4 |
| 5. The Fluorescence/absorption titration spectra of probe <b>3</b> with ClO <sup>-</sup> in PBS:CH <sub>3</sub> CN=1:1..... | 4 |
| 6. pH effect experiment .....                                                                                               | 4 |
| 7. LC-MS analysis of probe <b>3</b> + ClO <sup>-</sup> .....                                                                | 5 |
| 8. References .....                                                                                                         | 5 |

## 1. The preparation of PBS solution<sup>[1]</sup>

Preparation method of 0.01 M phosphate buffer.

Weight 8 g NaCl, 0.2 g KCl, 1.44 g Na<sub>2</sub>HPO<sub>4</sub> and 0.24 g H<sub>2</sub>PO<sub>4</sub>, dissolve in 800 ml distilled water, adjust the pH value of the solution to 7.4 with HCl, and finally add distilled water to 1 L. Steam sterilization under high pressure (at least 20 minutes) and store in a refrigerator at room temperature or 4°C.

## 2. <sup>1</sup>H-NMR spectrum of 1

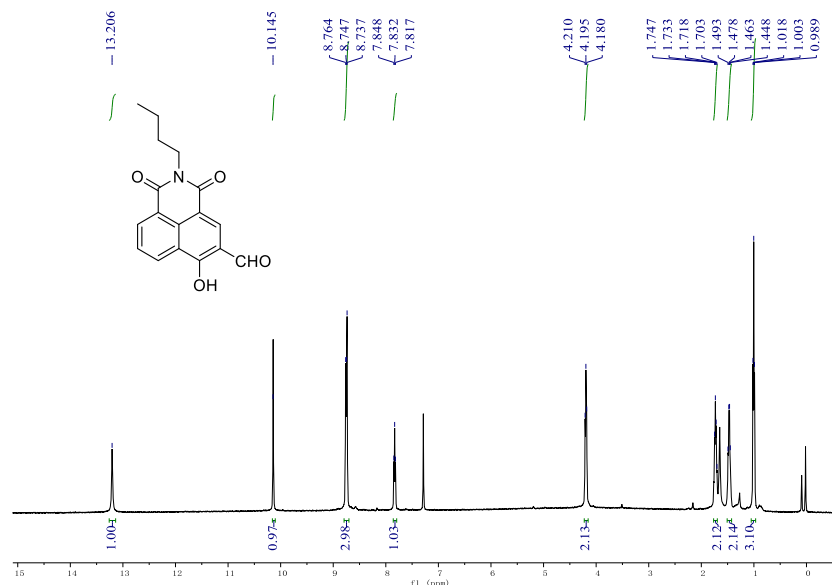

Figure S1 <sup>1</sup>H-NMR (500 MHz, CDCl<sub>3</sub>) spectrum of Compound 1.

## 3. <sup>1</sup>H NMR, <sup>13</sup>C NMR and LC-MS spectrum of probe 3

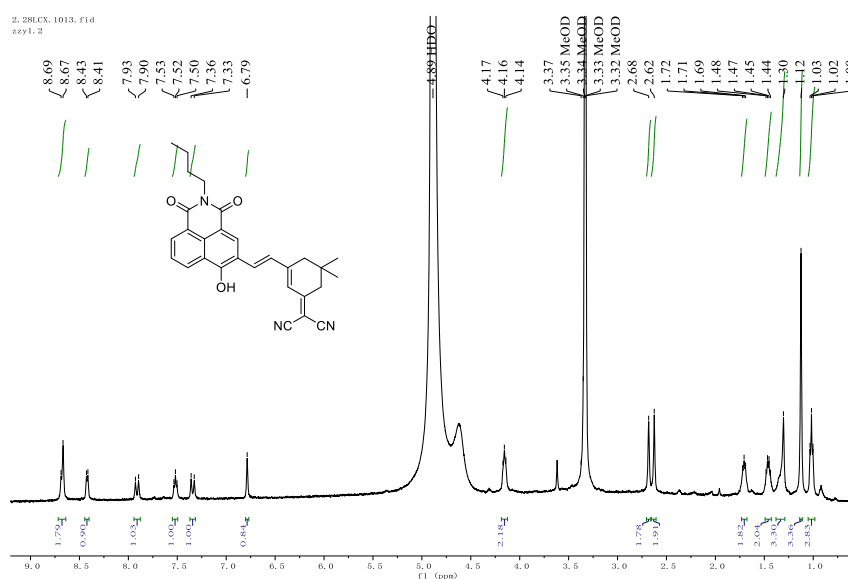

Figure S2 <sup>1</sup>H-NMR (500 MHz, Methanol-*d*<sub>4</sub>) spectrum of Compound 3.

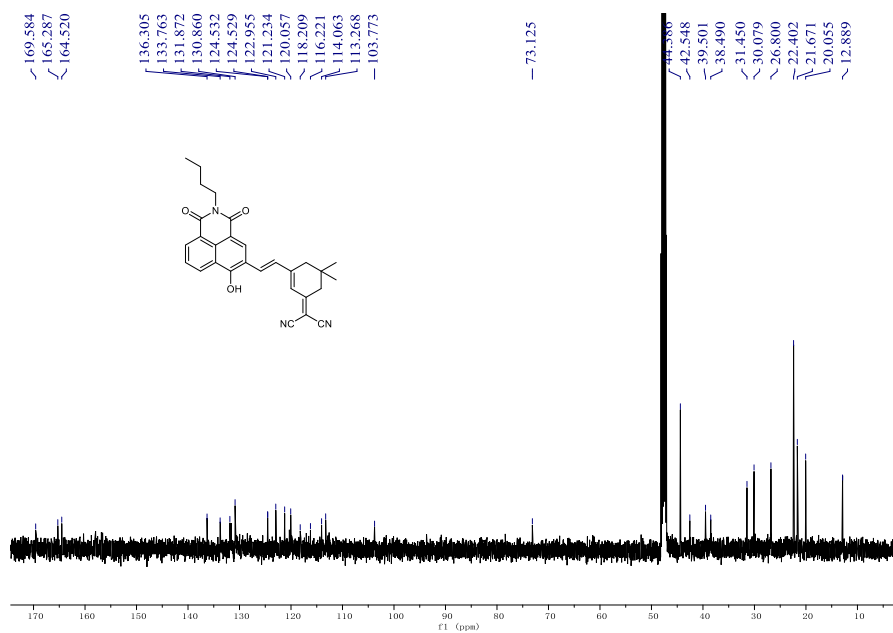

**Figure S3** <sup>13</sup>C-NMR (Methanol-*d*<sub>4</sub>, 125 MHz) spectrum of compound **3**.

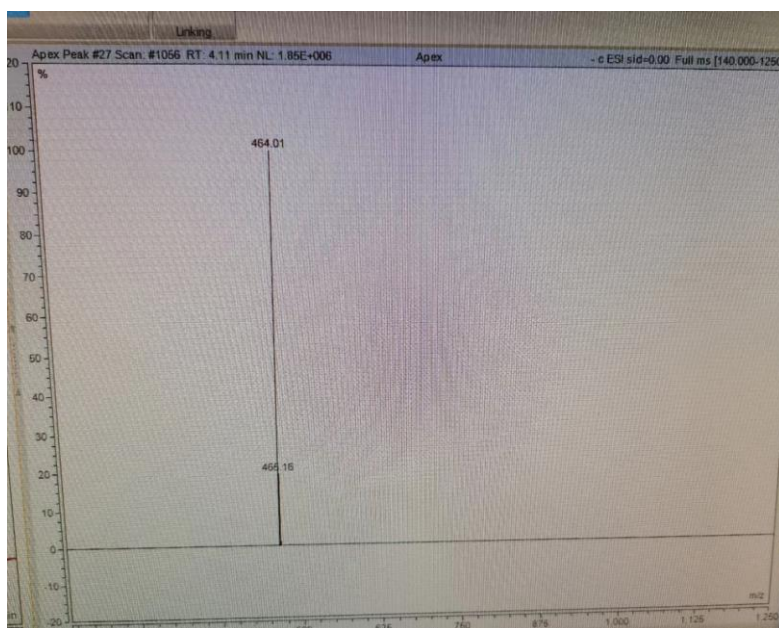

**Figure S4** LC-MS spectrum of **3**.

#### 4. Solvent effect of probe 3

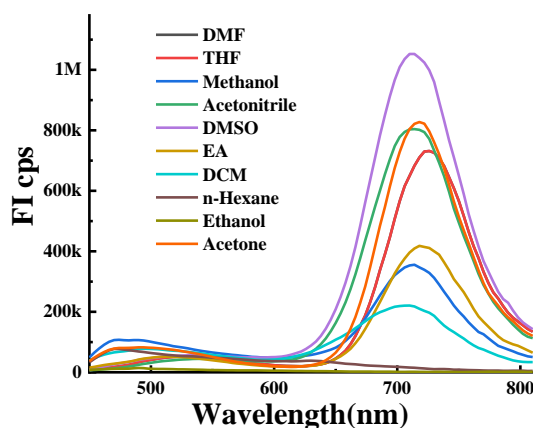

**Figure S5.** The emission spectra of probe **3** in various solvents (DMF, THF, Methanol, Acetonitrile, DMSO, EA, DCM, n-Hexane, Ethanol, Acetone) at 25 °C.

#### 5. The Fluorescence/absorption titration spectra of probe 3 with $\text{ClO}^-$ in $\text{PBS}:\text{CH}_3\text{CN}=1:1$

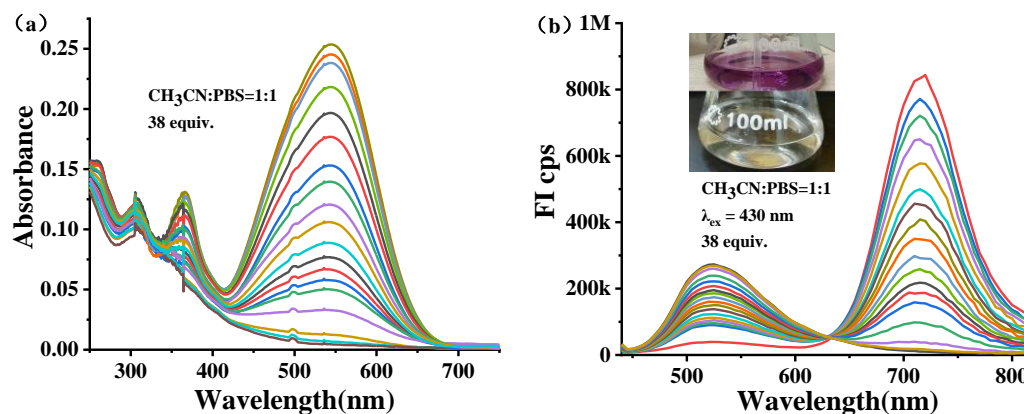

**Figure S6** (a) The absorption titration spectra of probe **3** ( $20 \mu\text{M}$ ) toward varying concentrations of  $\text{ClO}^-$  in PBS buffer (10 mM, pH = 7.4, 50%  $\text{CH}_3\text{CN}$ ); (b) Fluorescence titration spectra of probe **3** ( $20 \mu\text{M}$ ) with various concentrations of  $\text{ClO}^-$  in PBS buffer (10 mM, pH = 7.4, 50%  $\text{CH}_3\text{CN}$ ), Inset: colour changes of probe **3** (38 equiv.,  $\lambda_{\text{ex}} = 430 \text{ nm}$ ).

#### 6. pH effect experiment

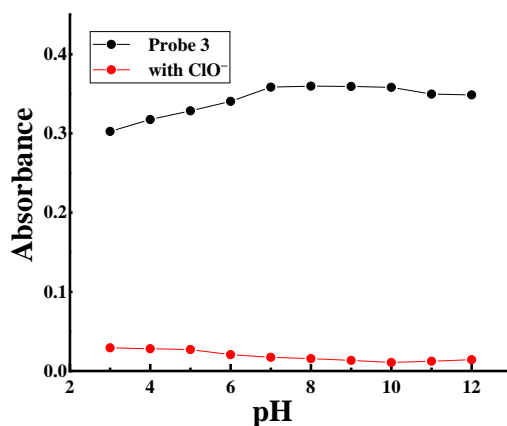

**Figure S7** The pH effects on the absorption spectra of probe **3** (20  $\mu\text{M}$ ) in the absence/presence of  $\text{ClO}^-$  (1.4 equiv.).

### 7. LC-MS analysis of probe **3** + $\text{ClO}^-$

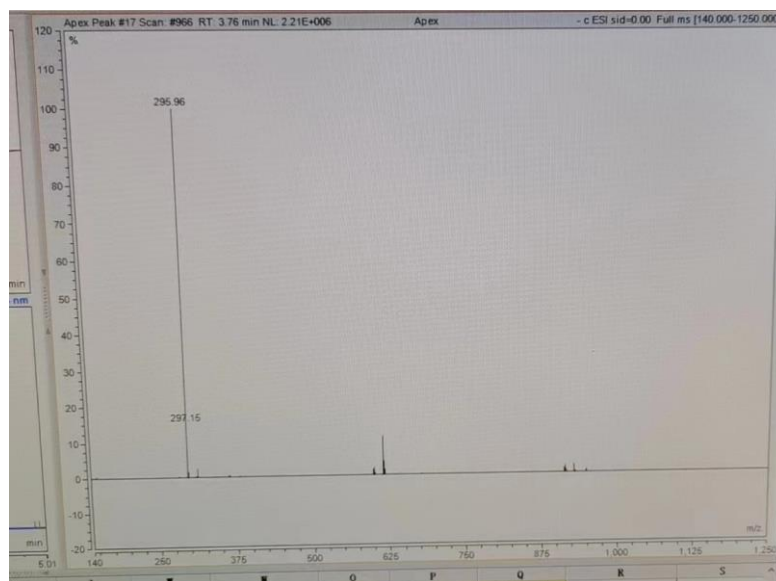

**Figure S8** LC-MS analysis of probe **3** +  $\text{ClO}^-$

### 8. References

[1]. Alpana. A. Thorat. Raj. Suryanarayanan. *Pharm. Res.*, 2019, **36**,98.
